# Supplementary material
Source: PubMed Central journal article supplement (PMC97615)
Supplement: nar_29_24_5044__1.pdf [file nar_29_24_5044__1.pdf]

SUPPLEMENTARY MATERIAL

**A**

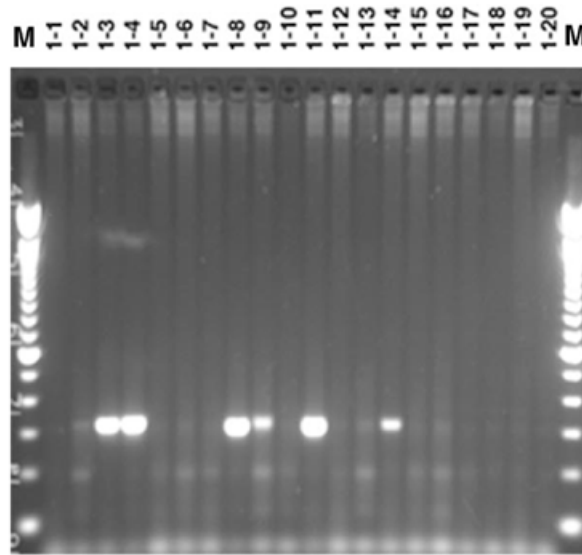

**B**

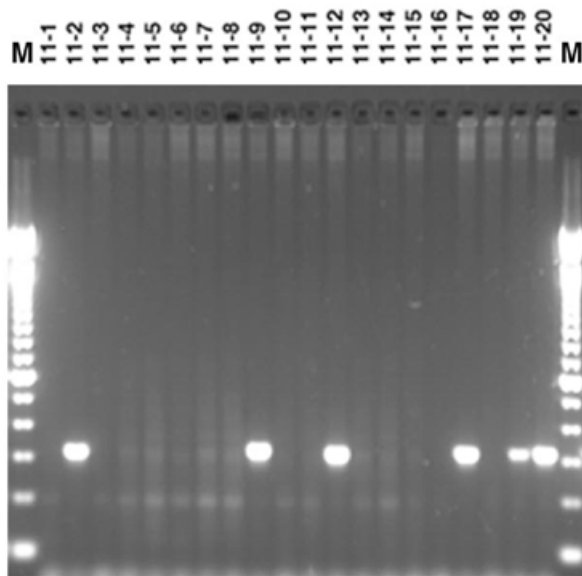

Figure S1.

**Table S1.** DNA and amino acid sequence changes in shuffled integrases

| bp # | bp Change  | aa #       | aa Change    | Cycle 1 Mutants | Cycle 2 Mutants     |
|------|------------|------------|--------------|-----------------|---------------------|
| 5    | C -> T     | 2          | Thr -> Ile   |                 | 1C2                 |
| 171  | G -> A     | silent     |              | 5C1             |                     |
| 195  | G -> A     | silent     |              |                 | 11C2                |
| 225  | G -> A     | silent     |              | 1C1             |                     |
| 265  | G -> A     | 89         | Gly -> Arg   |                 | 11C2                |
| 315  | G -> A     | silent     |              |                 | 2C2                 |
| 401  | A -> C     | 134        | Gln -> Pro   | 17C1            | 1C2, 2C2, 7C2, 11C2 |
| 479  | A -> G     | 160        | Lys -> Arg   |                 | 11C2                |
| 507  | C -> A     | silent     |              |                 | 7C2                 |
| 508  | G -> A     | 170        | Glu -> Lys   |                 | 7C2                 |
| 511  | T -> C     | silent     |              | 1C1             |                     |
| 736  | G -> A     | 246        | Ala -> Thr   | 5C1             | 7C2                 |
| 779  | A -> G     | 260        | Asp -> Gly   |                 | 2C2                 |
| 834  | C -> T     | silent     |              |                 | 2C2                 |
| 882  | T -> C     | silent     |              | 7C1             |                     |
| 906  | C -> T     | silent     |              |                 | 2C2                 |
| 921  | G -> A     | silent     |              | 17C1            |                     |
| 931  | C -> T     | 311        | Pro -> Ser   |                 | 1C2                 |
| 943  | A -> G     | 315        | Ile -> Val   |                 | 11C2                |
| 1060 | G -> A     | 354        | Gly -> Arg   | 12C1            | 1C2, 11C2           |
| 1109 | A -> G     | 370        | Asp -> Gly   | 5C1             |                     |
| 1135 | G -> A     | 379        | Val -> Ile   | 1C1             | 7C2                 |
| 1136 | T -> C     | 379        | Val -> Ala   |                 | 2C2                 |
| 1152 | C -> T     | silent     |              |                 | 2C2                 |
| 1158 | A -> G     | silent     |              |                 | 11C2                |
| 1274 | C -> T     | 425        | Ala -> Val   |                 | 1C2                 |
| 1420 | G -> A     | 474        | Asp -> Asn   |                 | 1C2                 |
| 1423 | G -> C     | 475        | Ala -> Pro   |                 | 2C2                 |
| 1445 | T -> C     | 483        | Leu -> Pro   | 17C1            | 1C2                 |
| 1509 | A -> G     | silent     |              | 1C1             |                     |
| 1542 | G -> A     | silent     |              |                 | 1C2                 |
| 1544 | A -> T     | 515        | Glu -> Val   |                 | 11C2                |
| 1592 | T -> C     | 531        | Leu -> Pro   |                 | 7C2                 |
| 1678 | G -> A     | 560        | Val -> Met   | 7C1             |                     |
| 1707 | C -> T     | silent     |              | 1C1             | 1C2                 |
| 1743 | A -> G     | silent     |              | 12C1            |                     |
| 1777 | DELETE "G" | 593 is new | frameshift * |                 | 11C2                |
| 1787 | G -> A     | 596        | Pro -> Gln   |                 | 11C2                |
| 1788 | G -> A     | silent     |              | 5C1             | 1C2                 |
| 1807 | G -> A     | 603        | Asp -> Asn   |                 | 2C2                 |
| 1813 | DELETE "C" | 605 is new | frameshift * | 1C1             | 1C2, 7C2            |
| 1817 | A -> G     | 606        | Asp -> Gly   | 12C1            |                     |
| 1825 | G -> C     | 609        | Glu -> Gln   | 7C1             |                     |
| 1828 | G -> C     | 610        | Asp -> His   | 12C1            |                     |
| 1835 | C -> T     | 612        | Ala -> Val   |                 | 2C2                 |

\*See Table S2.

Table S2. Amino acid changes in the last 20 residues of shuffled integrases

| Mutant                             | aa Sequence change                       | Net charge | Charge difference |
|------------------------------------|------------------------------------------|------------|-------------------|
| <i>Frameshift Changes</i>          |                                          |            |                   |
| WT INT                             | aa 592   W   AKPPTDDDEDDAQDGTEDVAA   613 | -8         | <b>+14</b>        |
| 11C2 frameshift at aa 593          | W   RSRQPPTTKTTPRTARKT   610             | +6         |                   |
| WT INT                             | aa 604   A   QDGTEDVAA   613             | -3         | <b>+6</b>         |
| 1C1, 1C2, 7C2 frameshift at aa 605 | A   RTARKT   610                         | +3         |                   |
| <i>Single Base Changes</i>         |                                          |            |                   |
| WT                                 | (aa#) P                                  | 0          | <b>0</b>          |
| 11C2                               | 596 Q                                    | 0          |                   |
| WT                                 | - D                                      | -1         | <b>+1</b>         |
| 2C2                                | 603 N                                    | 0          |                   |
| WT                                 | - D                                      | -1         | <b>+1</b>         |
| 12C1                               | 606 G                                    | 0          |                   |
| WT                                 | - E                                      | -1         | <b>+1</b>         |
| 7C1                                | 609 Q                                    | 0          |                   |
| WT                                 | - D                                      | -1         | <b>+2</b>         |
| 12C1                               | 610 H                                    | +1         |                   |
| WT                                 | A                                        | 0          | <b>0</b>          |
| 2C2                                | 612 V                                    | 0          |                   |
